# Supplementary material
Source: PubMed Central journal article supplement (PMC2823428)
Supplement: supp_M109.077800_jbc.M109.077800-1.pdf [file supp_M109.077800_jbc.M109.077800-1.pdf]

**SUPPLEMENTAL FIGURE LEGENDS**

**Supplemental Figure 1.** High fat feeding-induced effects in myocardial gene expressions were altered in CCM hearts. Following 16 weeks of diet intervention, myocardial gene expressions was measured in WT and CCM hearts isolated at ZT18 through microarray analysis. Heat diagram was generated using the BeadStudio software (Illumina, Inc., San Diego, CA).

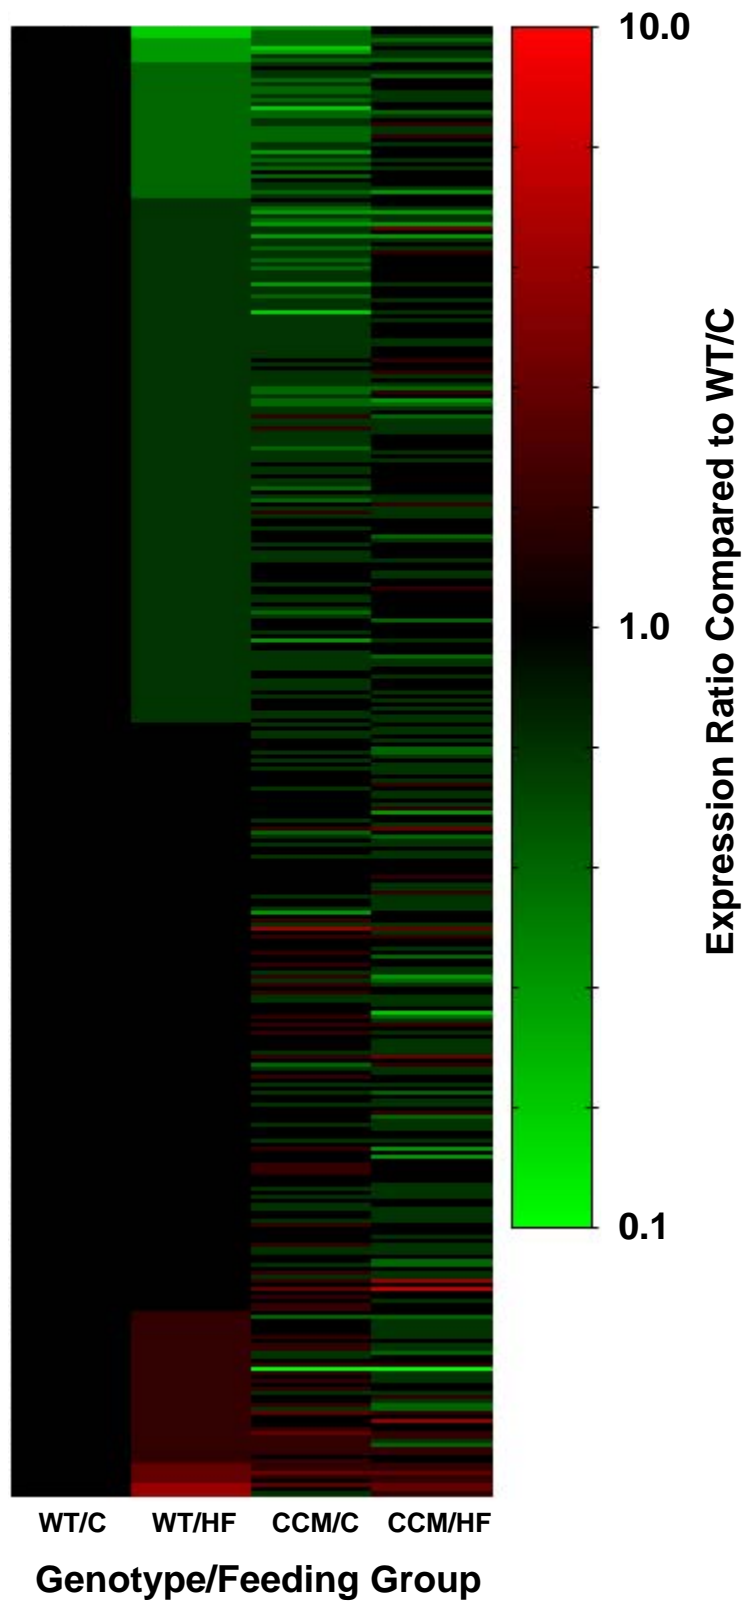

Supplemental Figure 1
